# Supplementary material for: Physical activity level and physical fitness in subjects with chronic musculoskeletal pain: a cross-sectional study
Source: PeerJ. 2024 Feb 6;12:e16880. doi: 10.7717/peerj.16880 (PMC10854395; doi:10.7717/peerj.16880)
Supplement: Supplemental Information 2 — The demographic data of both groups and the results for each test performed. IPAQ-ST results are categorized by intensity and activity type. [file peerj-12-16880-s002.xlsx]

## Sheet: Hoja1
ID	Group	Sex	Age	BMI	Diagnosis	Anatomical Region	Evolution (months)	ISDP comorbidities	IPAQ vigorous (min/week)	IPAQ moderate (min/week)	IPAQ light (min/week)	IPAQ RESIST (min/week)	IPAQ sitting time (hr/week)	IPAQ-TOTAL (METS)	PHYSICAL ACTIVITY LEVEL	30s-STS	HANDGRIP	VO2 peak
5	1	2	54	28.5	rotator cuff tend.	1	12	SD / GF	0	0	80	0	28	256	1	10.1	43.5	45.272
4	1	2	51	28.3	rotator cuff tend.	1	4	SD / GF	0	0	120	0	19	396	2	11	31.8	43.609
6	1	1	40	25.7	rotator cuff tend.	1	6	SD	0	0	150	0	35	495	2	15	35	34.99
10	1	2	35	25.3	Low back pain	3	5	GF	0	0	150	90	19	495	2	19.8	32.9	43.91
7	1	1	36	31.2	Low back pain	3	7	SD	0	0	160	0	16	528	2	14.5	46.8	33.647
2	1	2	59	22.8	rotator cuff tend.	1	5	SD / GF	0	0	180	0	7	594	2	17.7	26.2	46.043
8	1	2	52	24.8	Hip impingment	2	8	GF	0	0	180	0	7	594	2	17.7	28.3	40.921
9	1	2	58	28.3	Low back pain	3	9	GF	0	0	180	90	35	594	2	20.3	36.5	37.556
3	1	1	49	36.1	coccygedynia	3	4	SD / GF	0	0	210	0	35	693	2	14.67	77.2	29.51
11	1	1	42	28.7	neck pain	3	6	SD	0	0	210	60	18	693	2	17	27.4	32.579
14	1	1	60	30.4	ankle tend.	2	11	GF	0	0	210	0	70	693	2	18	37.2	23.67
1	1	2	56	30.2	epicondylalgia	1	8	SD	0	0	280	0	16	924	2	27.5	32.6	46.835
12	1	2	47	30.9	back pain	3	9	SD	0	0	280	0	25	924	2	20.5	25	37.614
15	1	2	54	26.7	plantar fasciitis	2	22	SD / GF	0	0	280	0	70	924	2	13.5	32.6	39.009
13	1	1	51	23.1	knee pain	2	10	SD / GF	0	0	300	0	35	990	2	25.6	45.9	30.41
27	2	2	48	29.4	knee pain	2	12	N/A	0	0	50	0	40	165	1	13.9	36.1	40.21
26	2	2	52	26.1	meniscal tear	2	6	N/A	0	0	70	0	38	231	1	10.5	80.7	40.94
16	2	2	32	25.5	ankle fracture	2	3	N/A	0	60	30	90	70	339	2	11.1	42.5	45.758
18	2	2	48	28.7	PFPS	2	4	N/A	0	180	10	180	35	753	2	8.52	58	38.16
17	2	2	29	33.1	wrist tend.	1	3	N/A	0	240	0	90	31	960	2	11.8	41.4	39.447
30	2	2	49	29.4	wrist fracture	1	3	N/A	0	0	300	0	25	990	2	14.1	39.4	37.83
25	2	2	35	27.6	chronic ankle instanbility	2	4	N/A	75	60	60	0	16	1038	2	10.1	36.6	45.97
28	2	1	51	26	rotator cuff tend.	1	4	N/A	36	45	210	90	35	1161	2	9.9	46.2	29.65
24	2	1	37	29.4	nucleus pulposus hernia	3	8	N/A	90	120	90	0	35	1497	2	8.7	48.6	33.66
23	2	1	38	24.4	neck pain	3	5	N/A	120	90	150	135	19	1815	2	9.5	78.8	37.69
21	2	2	39	28.6	rotator cuff tend.	2	5	N/A	180	60	180	60	25	2274	2	12.3	56.7	45.42
29	2	1	34	28.7	epicondylalgia	1	5	N/A	150	80	280	90	38	2444	2	8.7	78.1	33.96
22	2	2	47	28.4	low back pain	3	7	N/A	150	80	315	180	70	2559.5	2	13.1	55.9	42.73
19	2	1	32	26	Achilles tend.	2	6	N/A	200	210	180	280	18	3034	3	8.92	91.9	36.4
20	2	1	30	32.3	Achilles tend.	2	10	N/A	210	80	315	135	25	3039.5	3	7.58	74.4	33.46

## Sheet: Hoja2
Sex	Men =1; Women =2
NIVEL	Low=1;Moderate=2;High=3
Categoria Diagnostico	Upper Limb=1; Lower Limb=2; Trunk=3
IASP comorbidities	SD: Sleep deprivation
	GF: general fatigue
	N/A: does not apply
